# Supplementary material for: Prevalence, Pattern and Outcome of Pediatric Lassa Fever Disease (LFD) in a Tertiary Hospital, Southeast Nigeria
Source: Preprints.org preprint supplement (doi:10.20944/preprints202005.0269.v1), 2020-05-16
Supplement: Supplementary file 1 [file supplementary]

# FEDERAL TEACHING HOSPITAL ABAKALIKI

P.M.B. 102, ABAKALIKI, EBONYI STATE, NIGERIA Website: [www.fetha.gov.ng](http://www.fetha.gov.ng) Email: [info@fethabakaliki.org](mailto:info@fethabakaliki.org)

DR. ONWE EMEKA OGAH  
MB.BS, FWACP

*Chief Medical Director*

DR. ROBINSON CHUKWUDI ONOH  
MBBS Nig. FWACS, FMODG, FICS, MPH,  
FMAS, DMAS, C-ART, PGD (Pub Admin)

*Chairman Medical Advisory Committee*

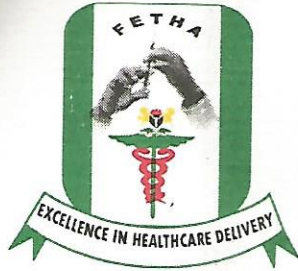

ALHAJI (DR.) AHMED TIJJANI RAMALAN  
FCILT, FCIS, MNI-UK, D.Sc

*Chairman, Board Of Management*

CHIEF C.C. OGBU (JP, KSM)  
B.Sc. (Hons), MBA, Msc,  
FCAI, FNIMN, FHAN, MNIM

*Director of Administration and  
Secretary to the Board Management*

FETHA/REC/VOL 2/2019/175

8<sup>th</sup> March, 2019

REC PROTOCOL NUMBER 07/02/2019 - 07/02/2019

REC APPROVAL NUMBER 07/02/2019 - 08/03/2019

**Dr. Orji Maria-Lauretta**  
Department of Paediatrics,  
Federal Teaching Hospital,  
Abakaliki.

## APPROVAL LETTER

**RE: PREVALENCE PATTERN SPATIO-TEMPORAL, DISTRIBUTION OF PAEDIATRIC LASSA VIRUS DISEASE (LVD) IN ABAKALIKI, EBONYI STATE SOUTHEAST NIGERIA.**

I have the pleasure to inform you that Research and Ethics Committee (REC) on 8<sup>th</sup> March, 2019, reviewed your research proposal on: "Prevalence pattern spatio-temporal, Distribution of Paediatric Lassa Virus Disease (LVD) in Abakaliki, Ebonyi State Southeast Nigeria" and has granted full approval for the study.

This approval dates from 8<sup>th</sup> March, 2019, to 7<sup>th</sup> March, 2020, if there is delay in starting the research, please inform the REC so that the dates of approval could be adjusted accordingly. All informed consent form must carry the REC approval number and duration of study.

No changes are permitted in the research without prior approval by the committee. The committee reserves the right to conduct compliance visit to your research site without previous notification.

On completion of the study, a copy of the write-up must be made available to Research and Ethics Committee.

Yours Sincerely,

**Rev. Fr. Dr. Chidi Obasi**

*Ag. Chairman, Research & Ethics Committee*
